# Supplementary material
Source: publisher figshare collection journal article supplement (https://karger.figshare.com/ndownloader/files/18736448)
Supplement: Supplementary file 1 [file 18736448]

**Supplemental Table 1: Current definitions of taller-than-wide (or non-parallel) shape according to original studies and five international sonographic risk-stratification systems.**

| ***Paper*** | ***Definition*** | ***Method*** | ***Plane*** |
| --- | --- | --- | --- |
| **AACE/ACE/AME**[1] | anteroposterior >transverse diameter when imaged in the transverse plane | Measurement | Transverse |
| **ATA**[2] | a shape taller than wide measured on a transverse view | Measurement | Transverse |
| **ACR TIRADS Reporting Lexicon**[3] | a ratio >1 in the anteroposterior diameter to the horizontal diameter when measured in the transverse plane | Measurement (?) | Transverse |
| **ACR TIRADS White Paper**[4] | height (“tallness”) greater than width of a nodule measured parallel and perpendicular to the ultrasound beam, respectively. | usually evident on visual inspection and rarely requires formal measurements | Axial (transverse) plane |
| **EU-TIRADS**[5] | the ratio of the anteroposterior-to-transverse diameter of a nodule is >1 | Measurement | N/A |
| **K-TIRADS**[6] | Anteroposterior diameter longer than transverse diameter on transverse image | Measurement | Transverse |
| **Original papers** | | | |
| Cappelli, 2006[7] | anteroposterior/transverse diameter ratio ≥1 | NS | NS |
| Chung et al, 2012[8] | greater in anteroposterior than transverse dimension | NS | NS |
| Goldfarb, 2011[9] | taller greater than wider | NS | transverse |
| Hong, 2010[10] | greater in anteroposterior than transverse dimension | NS | transverse |
| Kim et al, 2002[11] | greater in anteroposterior than transverse dimension | NS | NS |
| Kim et al, 2008[12] | greater in anteroposterior than transverse dimension | NS | NS |
| Kwak et al, 2009[13] | greater in anteroposterior than transverse dimension | NS | NS |
| Kwak et al, 2011[14] | greater in anteroposterior than transverse dimension | NS | NS |
| Lee et al, 2011[15] | greater in anteroposterior than transverse dimension | NS | NS |
| Mendez et al, 2008[16] | [height greater than width on transverse view](https://link.springer.com/article/10.1245%2Fs10434-008-0052-6) | NS | transverse |
| Moon et al, 2008[17] | anteroposterior diameter longer than transverse diameter | NS | transverse or longitudinal plane |
| Moon et al, 2010[18] | greater in anteroposterior than transverse dimension | NS | NS |
| Moon et al, 2011[19] | anteroposterior/transverse diameter ratio ≥1 | Measurement | any plane (3 alternative criteria) |
| Moon et al, 2012[20] | anteroposterior/transverse diameter ratio ≥1 | Measurement | NS |
| Nixon et al, 2013[21] | NS | NS | NS |
| Ozel et al, 2012[22] | greater in anteroposterior than transverse dimension | Measurement | transverse |
| Phuttharak et al, 2009 [23] | anteroposterior diameter longer than transverse diameter | Measurement | transverse or longitudinal plane |
| Sharma et al, 2011[24] | NS | NS | NS |
| Yoon et al, 2010[25] | greater in anteroposterior than transverse dimension | NS | NS |

*Abbreviations*: AACE/ACE/AME: American Association of Clinical Endocrinologists/American College of Endocrinology/Associazione Medici Endocrinologi; ACR: American College of Radiology; ATA: American Thyroid Association; EU-TIRADS: European Thyroid Imaging Reporting and Data Systems; K-TIRADS: Korean Thyroid Imaging Reporting and Data Systems; NS: not specified.

***References***

1 Gharib H, Papini E, Garber JR, Duick DS, Harrell RM, Hegedüs L, et al. AMERICAN ASSOCIATION OF CLINICAL ENDOCRINOLOGISTS, AMERICAN COLLEGE OF ENDOCRINOLOGY, AND ASSOCIAZIONE MEDICI ENDOCRINOLOGI MEDICAL GUIDELINES FOR CLINICAL PRACTICE FOR THE DIAGNOSIS AND MANAGEMENT OF THYROID NODULES--2016 UPDATE. Endocr Pract. 2016 May;22(5):622–39.

2 Haugen BR, Alexander EK, Bible KC, Doherty GM, Mandel SJ, Nikiforov YE, et al. 2015 American Thyroid Association Management Guidelines for Adult Patients with Thyroid Nodules and Differentiated Thyroid Cancer: The American Thyroid Association Guidelines Task Force on Thyroid Nodules and Differentiated Thyroid Cancer. Thyroid. 2016 Jan;26(1):1–133.

3 Grant EG, Tessler FN, Hoang JK, Langer JE, Beland MD, Berland LL, et al. Thyroid Ultrasound Reporting Lexicon: White Paper of the ACR Thyroid Imaging, Reporting and Data System (TIRADS) Committee. Journal of the American College of Radiology. 2015 Dec;12(12):1272–9.

4 Tessler FN, Middleton WD, Grant EG, Hoang JK, Berland LL, Teefey SA, et al. ACR Thyroid Imaging, Reporting and Data System (TI-RADS): White Paper of the ACR TI-RADS Committee. Journal of the American College of Radiology. 2017 May;14(5):587–95.

5 Russ G, Bonnema SJ, Erdogan MF, Durante C, Ngu R, Leenhardt L. European Thyroid Association Guidelines for Ultrasound Malignancy Risk Stratification of Thyroid Nodules in Adults: The EU-TIRADS. Eur Thyroid J. 2017 Sep;6(5):225–37.

6 Shin JH, Baek JH, Chung J, Ha EJ, Kim J, Lee YH, et al. Ultrasonography Diagnosis and Imaging-Based Management of Thyroid Nodules: Revised Korean Society of Thyroid Radiology Consensus Statement and Recommendations. Korean J Radiol. 2016;17(3):370.

7 Cappelli C, Castellano M, Pirola I, Gandossi E, De Martino E, Cumetti D, et al. Thyroid nodule shape suggests malignancy. European Journal of Endocrinology. 2006 Jul;155(1):27–31.

8 Chung J, Youk JH, Kim J-A, Kwak JY, Kim E, Ryu YH, et al. Initially non-diagnostic ultrasound-guided fine needle aspiration cytology of thyroid nodules: value and management. Acta Radiol. 2012 Mar;53(2):168–73.

9 Goldfarb M, Gondek S, Solorzano C, Lew JI. Surgeon-performed ultrasound can predict benignity in thyroid nodules. Surgery. 2011 Sep;150(3):436–41.

10 Hong YJ, Son EJ, Kim E-K, Kwak JY, Hong SW, Chang H-S. Positive predictive values of sonographic features of solid thyroid nodule. Clinical Imaging. 2010 Mar;34(2):127–33.

11 Kim E-K, Park CS, Chung WY, Oh KK, Kim DI, Lee JT, et al. New sonographic criteria for recommending fine-needle aspiration biopsy of nonpalpable solid nodules of the thyroid. AJR Am J Roentgenol. 2002 Mar;178(3):687–91.

12 Kim JY, Lee CH, Kim SY, Jeon WK, Kang JH, An SK, et al. Radiologic and pathologic findings of nonpalpable thyroid carcinomas detected by ultrasonography in a medical screening center. J Ultrasound Med. 2008 Feb;27(2):215–23.

13 Kwak JY, Kim E-K, Kim MJ, Son EJ. Significance of sonographic characterization for managing subcentimeter thyroid nodules. Acta Radiol. 2009 Oct;50(8):917–23.

14 Kwak JY, Han KH, Yoon JH, Moon HJ, Son EJ, Park SH, et al. Thyroid Imaging Reporting and Data System for US Features of Nodules: A Step in Establishing Better Stratification of Cancer Risk. Radiology. 2011 Sep;260(3):892–9.

15 Lee YH, Kim DW, In HS, Park JS, Kim SH, Eom JW, et al. Differentiation between benign and malignant solid thyroid nodules using an US classification system. Korean J Radiol. 2011 Oct;12(5):559–67.

16 Méndez W, Rodgers SE, Lew JI, Montano R, Solórzano CC. Role of surgeon-performed ultrasound in predicting malignancy in patients with indeterminate thyroid nodules. Ann Surg Oncol. 2008 Sep;15(9):2487–92.

17 Moon W-J, Jung SL, Lee JH, Na DG, Baek J-H, Lee YH, et al. Benign and malignant thyroid nodules: US differentiation--multicenter retrospective study. Radiology. 2008 Jun;247(3):762–70.

18 Moon HJ, Kwak JY, Kim MJ, Son EJ, Kim E-K. Can Vascularity at Power Doppler US Help Predict Thyroid Malignancy? Radiology. 2010 Apr;255(1):260–9.

19 Moon HJ, Kwak JY, Kim E-K, Kim MJ. A Taller-Than-Wide Shape in Thyroid Nodules in Transverse and Longitudinal Ultrasonographic Planes and the Prediction of Malignancy. Thyroid. 2011 Nov;21(11):1249–53.

20 Moon HJ, Kwak JY, Choi YS, Kim E-K. How to manage thyroid nodules with two consecutive non-diagnostic results on ultrasonography-guided fine-needle aspiration. World J Surg. 2012 Mar;36(3):586–92.

21 Nixon IJ, Ganly I, Hann LE, Yu C, Palmer FL, Whitcher MM, et al. Nomogram for selecting thyroid nodules for ultrasound-guided fine-needle aspiration biopsy based on a quantification of risk of malignancy. Head Neck. 2013 Jul;35(7):1022–5.

22 Ozel A, Erturk SM, Ercan A, Yılmaz B, Basak T, Cantisani V, et al. The diagnostic efficiency of ultrasound in characterization for thyroid nodules: how many criteria are required to predict malignancy? Med Ultrason. 2012 Mar;14(1):24–8.

23 Phuttharak W, Somboonporn C, Hongdomnern G. Diagnostic performance of gray-scale versus combined gray-scale with colour doppler ultrasonography in the diagnosis of malignancy in thyroid nodules. Asian Pac J Cancer Prev. 2009;10(5):759–64.

24 Sharma A, Gabriel H, Nemcek AA, Nayar R, Du H, Nikolaidis P. Subcentimeter thyroid nodules: utility of sonographic characterization and ultrasound-guided needle biopsy. AJR Am J Roentgenol. 2011 Dec;197(6):W1123-1128.

25 Yoon JH, Kwak JY, Kim E-K, Moon HJ, Kim MJ, Kim JY, et al. How to approach thyroid nodules with indeterminate cytology. Ann Surg Oncol. 2010 Aug;17(8):2147–55.
